# Supplementary material for: Comprehensive Genomic Profiling Identifies Novel Genetic Predictors of Response to Anti–PD-(L)1 Therapies in Non–Small Cell Lung Cancer
Source: Oxford University Press journal article supplement (doi:10.1158/1078-0432.ccr-19-0585), 2019-05-13
Supplement: 10780432ccr190585-sup-217520_2_supp_5484216_pqks8s.xlsx [file 10780432ccr190585-sup-217520_2_supp_5484216_pqks8s.xlsx]

## Sheet: Sheet1
Table S2. Individual gene mutations correlate with immunotherapy response in both Rizvi et al and our data.
	PFS				DCB
	our data		Rizvi		our data		Rizvi
gene	p	TMB_p	p	TMB_p	p	TMB_p	p	TMB_p
FAT1					0.032	0.013	0.052	0.323
ERBB2_activation	0.054	0.003	0.069	0.04
EGFR_activation	0.27	0.002	0.092	0.069
PTPRD	0.088	0.003	0.164	0.175
p, p value after bi-variate analysis taking into account TMB
TMB_p, p value of TMB following bi-variate analysis
