# Supplementary material for: Comprehensive Genomic Profiling Identifies Novel Genetic Predictors of Response to Anti–PD-(L)1 Therapies in Non–Small Cell Lung Cancer
Source: Oxford University Press journal article supplement (doi:10.1158/1078-0432.ccr-19-0585), 2019-05-13
Supplement: 10780432ccr190585-sup-217520_2_supp_5484217_pqks8s.xlsx [file 10780432ccr190585-sup-217520_2_supp_5484217_pqks8s.xlsx]

## Sheet: Sheet1
Table S3. Influence of histology on survival analyses.
FAT1 mutation in adenocarcinoma
	DCB	NDB
mutant	5	1
wildtype	9	29		fishe exact p = 0.0089
chr3p segment						ccr pathway
	HR	p value	lower 95% CI	upper 95% CI			HR	p value	lower 95% CI	upper 95% CI
squamous vs adenocarcinoma	0.774	0.37	0.442	1.355		squamous vs adenocarcinoma	0.906	0.72	0.53	1.551
loss vs wildtype	2.717	0.016	1.206	6.098		loss vs wildtype	2.682	0.025	1.13	6.37
