# Supplementary material for: Comprehensive Genomic Profiling Identifies Novel Genetic Predictors of Response to Anti–PD-(L)1 Therapies in Non–Small Cell Lung Cancer
Source: Oxford University Press journal article supplement (doi:10.1158/1078-0432.ccr-19-0585), 2019-05-13
Supplement: 10780432ccr190585-sup-217520_2_supp_5484218_pqks8s.xlsx [file 10780432ccr190585-sup-217520_2_supp_5484218_pqks8s.xlsx]

## Sheet: Sheet1
Table S4. Copy number alterations correlate with immunotherapy response in both Miao et al and our data
	PFS
	our data		miao
gene	p	tmb_p	p	tmb_p
ALS2CL	0.149394	0.00292538	0.000928614	2.37384e-05
CCR8	0.0583913	0.0011976	0.000928614	2.37384e-05
COL7A1	0.081508	0.00375858	0.000928614	2.37384e-05
CYP2D6	0.0204349	0.0012794	0.0470783	0.000163934
CYSLTR2	0.012423	0.002712	0.117602	0.000148201
ITGA9	0.000455691	0.00185143	0.000928614	2.37384e-05
LTF	0.0093383	0.00120171	0.000928614	2.37384e-05
NCKIPSD	0.0121566	0.000527672	0.000928614	2.37384e-05
PLCD1	0.0093383	0.00120171	0.000928614	2.37384e-05
PLXNB1	0.0842666	0.00213416	0.000928614	2.37384e-05
PTH1R	0.0195334	0.00098153	0.000928614	2.37384e-05
p, p value after bi-variate analysis taking into account TMB
TMB_p, p value of TMB following bi-variate analysis
