# Supplementary material for: Comprehensive Genomic Profiling Identifies Novel Genetic Predictors of Response to Anti–PD-(L)1 Therapies in Non–Small Cell Lung Cancer
Source: Oxford University Press journal article supplement (doi:10.1158/1078-0432.ccr-19-0585), 2019-05-13
Supplement: 10780432ccr190585-sup-217520_2_supp_5484219_pqks8s.xls [file 10780432ccr190585-sup-217520_2_supp_5484219_pqks8s.xls]

## Sheet: Table S5-20190329.csv
Table S5. Copy number alterations in genes in immune-related pathways in each patient.
	P27	P02	P26	P13	P19	P23	P25	P29	P30	P48	P55	P73	P38	P75	P01	P04	P24	P15	P42	P63	P05	P06	P14	P20	P17	P22	P40	P53	P49	P56	P61	P66	P77	P46	P08	P07	P12	P03	P16	P21	P09	P31	P32	P34	P35	P37	P33	P39	P41
Antigen_Processing_and_Presentation	others	others	others	others	others	others	others	others	others	others	others	others	others	others	others	others	others	others	others	others	others	others	loss	others	others	others	others	others	others	others	others	others	others	others	others	others	others	others	others	others	others	others	others	others	others	others	others	others	others
Antimicrobials	others	others	others	others	others	others	others	others	others	others	others	others	others	others	others	others	others	others	others	others	others	others	loss	others	others	others	others	others	others	others	others	others	others	others	others	others	others	others	others	others	others	others	others	others	others	others	others	others	others
BCRSignalingPathway	others	others	others	others	others	others	others	others	others	others	others	others	others	others	others	others	others	others	others	others	others	others	others	others	others	others	others	others	others	others	others	others	others	others	others	others	others	others	others	others	others	others	others	others	others	others	others	others	others
Chemokines	others	others	others	others	others	others	others	others	others	others	others	others	others	others	others	others	others	others	others	others	others	others	loss	others	others	others	others	others	others	others	others	others	others	others	others	others	others	others	others	others	others	others	others	others	others	others	others	others	others
Chemokine_Receptors	others	others	others	others	others	others	others	others	others	others	others	others	others	others	others	others	others	others	others	others	others	others	others	others	others	others	others	others	others	others	others	others	others	loss	others	others	loss	others	others	others	loss	others	others	loss	others	others	others	others	others
Cytokines	others	others	others	others	others	others	others	others	others	others	others	others	others	others	others	others	others	others	others	others	others	others	loss	others	others	others	others	others	others	others	others	others	others	others	others	others	loss	others	others	others	others	others	others	loss	others	others	others	others	others
Cytokine_Receptors	others	others	others	others	others	others	others	others	others	others	others	others	others	others	others	others	others	others	others	others	others	others	others	others	others	others	others	others	others	others	others	others	others	others	others	others	loss	others	others	others	others	others	others	loss	others	others	others	others	others
Interferons	loss	others	others	loss	loss	others	others	loss	others	others	others	others	loss	others	others	others	others	loss	loss	others	loss	others	loss	loss	loss	others	others	loss	loss	others	others	others	others	loss	others	loss	others	others	others	others	loss	loss	loss	loss	others	others	loss	loss	others
Interferon_Receptor	others	others	others	others	others	others	others	others	others	others	others	others	others	others	others	others	others	others	others	others	others	others	others	others	others	others	others	others	others	others	others	others	others	others	others	others	others	others	others	others	others	others	others	others	others	others	others	others	others
Interleukins	others	others	others	others	others	others	others	others	others	others	others	others	others	others	others	others	others	others	others	others	others	others	loss	others	others	others	others	others	others	others	others	others	others	others	others	others	loss	others	others	others	others	others	others	loss	others	others	others	others	others
Interleukins_Receptor	others	others	others	others	others	others	others	others	others	others	others	others	others	others	others	others	others	others	others	others	others	others	others	others	others	others	others	others	others	others	others	others	others	others	others	others	others	others	others	others	others	others	others	others	others	others	others	others	others
NaturalKiller_Cell_Cytotoxicity	others	others	others	others	others	others	others	others	others	others	others	others	others	others	others	others	others	others	others	others	others	others	loss	others	others	others	others	others	others	others	others	others	others	others	others	others	others	others	others	loss	others	others	others	others	others	others	others	others	others
TCRsignalingPathway	others	others	others	others	others	others	others	others	others	others	others	others	others	others	others	others	others	others	others	others	others	others	others	others	others	others	others	others	others	others	others	others	others	others	others	others	others	others	others	others	others	others	others	others	others	others	others	others	others
TGFb_Family_Member	others	others	others	others	others	others	others	others	others	others	others	others	others	others	others	others	others	others	others	others	others	others	others	others	others	others	others	others	others	others	others	others	others	others	others	others	loss	others	others	loss	others	others	others	loss	others	others	loss	others	others
TGFb_Family_Member_Receptor	others	others	others	others	others	others	others	others	others	others	others	others	others	others	others	others	others	others	others	others	others	others	loss	others	others	loss	others	others	others	others	others	others	others	others	others	others	loss	others	others	others	others	others	others	loss	others	others	others	others	others
TNF_Family_Members	others	others	others	others	others	others	others	others	others	others	others	others	others	others	others	others	others	others	others	others	others	others	loss	others	others	others	others	others	others	others	others	others	others	others	others	others	others	others	others	loss	others	others	others	loss	others	others	others	others	others
TNF_Family_Members_Receptors	others	others	others	others	others	others	others	others	others	others	others	others	others	others	others	others	others	others	others	others	others	others	others	others	others	others	others	others	others	others	others	others	others	others	others	others	loss	others	others	loss	others	others	others	others	others	others	others	others	others
Others indicate no change and/or gain in copy number
[truncated: 24 more columns]
