# Supplementary material for: Comprehensive Genomic Profiling Identifies Novel Genetic Predictors of Response to Anti–PD-(L)1 Therapies in Non–Small Cell Lung Cancer
Source: Oxford University Press journal article supplement (doi:10.1158/1078-0432.ccr-19-0585), 2019-05-13
Supplement: 10780432ccr190585-sup-217520_2_supp_5484220_pqks8s.xls [file 10780432ccr190585-sup-217520_2_supp_5484220_pqks8s.xls]

## Sheet: Table S5-20190212.csv
Table S6. Impact of copy number loss in genes in immune-related pathways on immunotherapy response in Miao et al and our data
	our data							Miao et al.
	number of patients	p value	mPFS_loss	mPFS_wt	HR	lower_95	upper_95	Number of patients	p value	mPFS_loss	mPFS_wt	HR	lower_95_miao	upper_95_miao
Antigen_Processing_and_Presentation	2	0.909792	35	63	0.884108	0.121766	6.41923	47	0.121695	84	163	1.34094	0.924348	1.94527
Antimicrobials	1	0.302639	NA	63	1.08e-07	0	Inf	28	0.00192337	79	143	1.96665	1.27206	3.04051
BCRSignalingPathway	0							29	0.000372114	77	163	2.14896	1.39619	3.30758
Chemokines	2	0.965464	26	63	0.940465	0.12948	6.83096	35	0.00203039	84	163	1.89319	1.25476	2.85644
Chemokine_Receptors	7	0.0058376	51	64.5	2.96805	1.32967	6.62523	26	9.92e-05	77	163	2.32295	1.50098	3.59505
Cytokines	4	0.384244	55.5	63	1.6842	0.521732	5.43675	39	0.0636393	84	146	1.44716	0.976755	2.14412
Cytokine_Receptors	2	0.177648	55.5	63	2.72387	0.645728	11.4901	30	1.7e-07	73	165	2.88421	1.90495	4.36689
Interferons	32	0.10088	63	64	1.50041	0.918845	2.45007	70	0.20817	100	170	1.24096	0.885603	1.73892
Interferon_Receptor	0							44	0.384585	99	137	1.19085	0.804497	1.76275
Interleukins	3	0.886215	60	63	1.12284	0.271946	4.63612	32	0.0686516	90	146	1.47506	0.96828	2.24706
Interleukins_Receptor	0							37	3.57e-05	78	170	2.23537	1.51199	3.30485
NaturalKiller_Cell_Cytotoxicity	3	0.784759	61	63	1.21126	0.293577	4.99748	65	0.0115766	84	170	1.53991	1.09898	2.15776
TCRsignalingPathway	0							33	0.014885	78	143	1.66185	1.09805	2.51512
TGFb_Family_Member	5	0.00657837	51	64.5	3.60818	1.3766	9.45733	22	0.322914	85	143	1.29156	0.780303	2.13779
TGFb_Family_Member_Receptor	4	0.870544	85	63	1.10263	0.342153	3.55336	44	0.000782825	79	170	1.87458	1.29125	2.72144
TNF_Family_Members	3	0.914901	61	63	1.08706	0.263359	4.48706	49	0.0289247	79	151	1.5045	1.04053	2.17537
TNF_Family_Members_Receptors	3	0.0584837	60	63.5	3.04086	0.922609	10.0224	46	0.110728	99	151	1.3469	0.932895	1.94463
mPFS, median progression-free survival
HR, hazards ratio
